# Supplementary material for: Thin Film Mixed Matrix Hollow Fiber Membrane Fabricated by Incorporation of Amine Functionalized Metal-Organic Framework for CO2/N2 Separation
Source: MDPI journal article supplement (doi:10.3390/ma14123366), 2021-06-17
Supplement: s1 [file s1]

# Thin Film Mixed Matrix Hollow Fiber Membrane Fabricated by Incorporation of Amine Functionalized Metal-Organic Framework for CO<sub>2</sub>/N<sub>2</sub> Separation

Guoqiang Li <sup>1</sup>, Wojciech Kujawski <sup>1,2,\*</sup>, Katarzyna Knozowska <sup>1</sup> and Joanna Kujawa <sup>1</sup>

<sup>1</sup> Department of Physical Chemistry and Physical Chemistry of Polymers, Faculty of Chemistry, Nicolaus Copernicus University in Toruń, 7 Gagarina Street, 87-100 Toruń, Poland

<sup>2</sup> Moscow Engineering Physics Institute, National Research Nuclear University MEPhI, 31 Kashira Hwy, 115409 Moscow, Russia

\* Correspondence: kujawski@chem.umk.pl; Tel.: +48-56-6114517

**Table S1.** The gas permeance and ideal selectivity of thin film hollow fiber membranes fabricated from single concentration of coating solution.

| Sample         | CO <sub>2</sub> Permeance (GPU) | N <sub>2</sub> Permeance (GPU) | CO <sub>2</sub> /N <sub>2</sub> Selectivity |
|----------------|---------------------------------|--------------------------------|---------------------------------------------|
| Pebax®-6-1-PP* | 62.80 ± 0.59                    | 25.92 ± 0.40                   | 2.4                                         |
| Pebax®-3-1-PP* | 376.46 ± 14.02                  | 234.82 ± 9.23                  | 1.6                                         |
| Pebax®-3-4-PP* | 51.85 ± 1.68                    | 28.16 ± 0.55                   | 1.84                                        |

\* Pebax®-x-y-PP indicates the selective thin layer was formed from x wt% Pebax® 2533 solution with y layers.

**Table S2.** The thickness of the Pebax/UiO-66-NH<sub>2</sub> hybrid layer measured from the top part and bottom part of the prepared mixed matrix thin film hollow fiber membrane. The bottom part is close to the coating solution while the top part is close to the metal holder during the dip-coating process.

| Membrane                      | Thickness of Selective Layer (μm) |             |             |
|-------------------------------|-----------------------------------|-------------|-------------|
|                               | Upper Part                        | Bottom Part | Average     |
| Pristine Pebax                | 6.06 ± 0.49                       | 7.61 ± 1.17 | 6.97 ± 1.19 |
| 5 wt% UiO-66-NH <sub>2</sub>  | 3.58 ± 0.66                       | 7.49 ± 1.01 | 5.36 ± 0.97 |
| 10 wt% UiO-66-NH <sub>2</sub> | 5.58 ± 0.83                       | 8.15 ± 0.86 | 7.36 ± 1.46 |
| 15 wt% UiO-66-NH <sub>2</sub> | 5.06 ± 0.68                       | 6.35 ± 0.70 | 5.40 ± 0.88 |
| 20 wt% UiO-66-NH <sub>2</sub> | 6.70 ± 0.33                       | 8.26 ± 1.07 | 6.82 ± 1.16 |
| 50 wt% UiO-66-NH <sub>2</sub> | 4.76 ± 0.76                       | 8.89 ± 1.83 | 6.83 ± 2.51 |

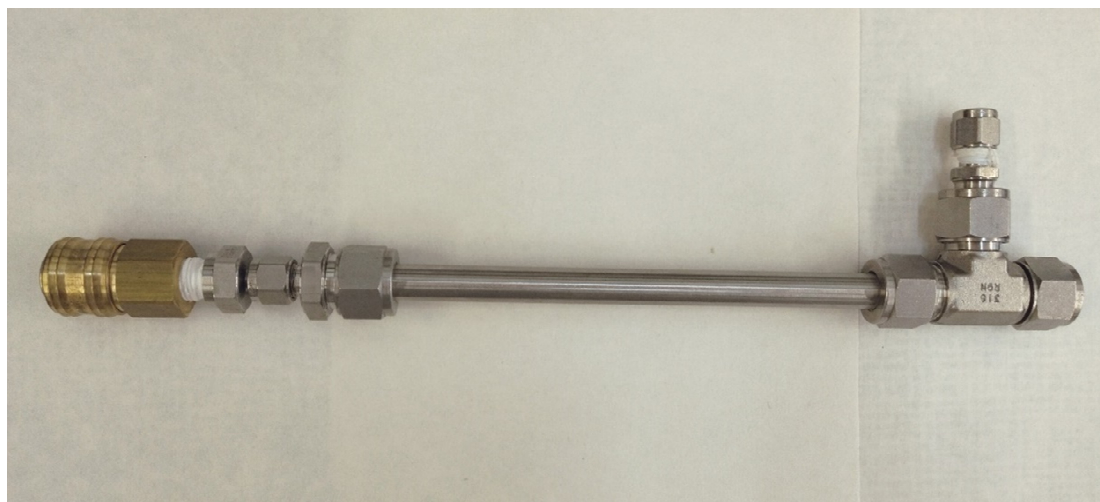

**Figure S1.** Hollow fiber module for testing gas permeance of hollow fiber membranes (This module is designed by the Membranes and Membrane Techniques Research Group in Nicolaus Copernicus University in Toruń. All the components of this module including housing part, end caps, and ports were purchased from Swagelok, Solon, OH, SUA).

#### Zr element mapping

(a)

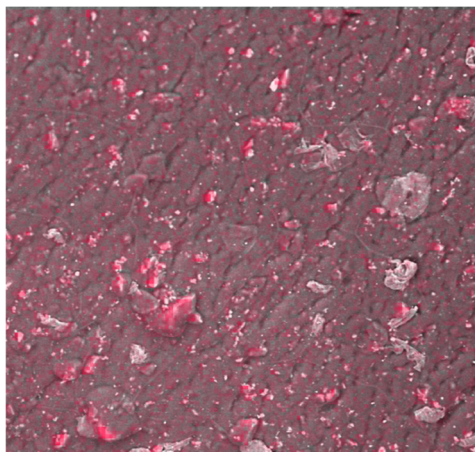

(b)

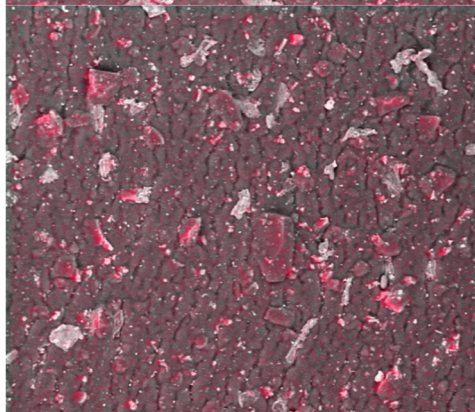

#### Element analysis of UiO-66-NH<sub>2</sub> Pebax® 2533-UiO-66-NH<sub>2</sub>/PP membranes

| Atomic percentage |         |
|-------------------|---------|
| C                 | 68.16 % |
| O                 | 23.74 % |
| N                 | 8.05 %  |
| Zr                | 0.05 %  |

| Atomic percentage |         |
|-------------------|---------|
| C                 | 71.23 % |
| O                 | 21.17 % |
| N                 | 7.50 %  |
| Zr                | 0.10 %  |

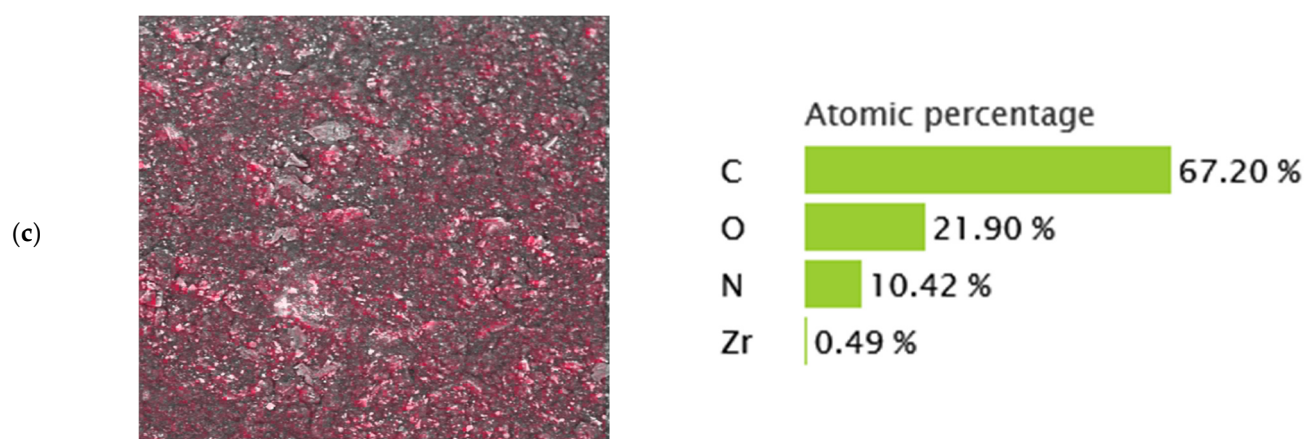

**Figure S2.** The Zr element mapping and element analysis of Pebax® 2533-UiO-66-NH<sub>2</sub>/PP thin film mixed matrix hollow fiber membranes by EDX. (a) 15 wt% UiO-66-NH<sub>2</sub>, (b) 20 wt% UiO-66-NH<sub>2</sub>, (c) 50 wt% UiO-66-NH<sub>2</sub>.
